# Supplementary material
Source: PubMed Central journal article supplement (PMC3234847)

## SUPPLEMENTARY INFORMATION

THE SH3 DOMAIN IS REQUIRED FOR JAM-A BINDING TO THE THIRD PDZ DOMAIN OF ZO-1\*

**Julian Nomme<sup>1</sup>, Alan S. Fanning<sup>2</sup>, Michael Caffrey<sup>1</sup>, Ming F. Lye<sup>1a</sup>, James M. Anderson<sup>3</sup>, and Arnon Lavie<sup>1</sup>**

<sup>1</sup>From the Department of Biochemistry and Molecular Genetics, University of Illinois at Chicago, Chicago, IL 60607, USA

<sup>2</sup>Department of Cell and Molecular Physiology, University of North Carolina at Chapel Hill, Chapel Hill, NC 27599-7545, USA

<sup>3</sup>NHLBI, National Institutes of Health, Bethesda, MD 20892

<sup>a</sup>: current address: Department of Biological Chemistry and Molecular Pharmacology, Harvard Medical School, 240 Longwood Avenue, C2-130, Boston, MA, 02115

\*Running title: Structure of the ZO-1 PDZ3-SH3-GUK domains

### FIGURE LEGENDS

**SUPPLEMENTARY FIGURE S1.** *PSG asymmetric unit.* PSG crystallized in the P3<sub>2</sub> space group and contains 4 molecules in the asymmetric unit. Two of the four molecules are missing the GUK domain that could not be modeled. Molecules are represented as a ribbon diagram and colored by chain.

**SUPPLEMENTARY FIGURE S2.** *Electrostatic surface potential of the PSG core module.* The GUK domain presents a patch of basic residues (blue color) while the PDZ3 domain exhibits a negatively charged surface (red color) on the same face of the protein.

**SUPPLEMENTARY FIGURE S3.** *Sequence alignment of mammalian JAM proteins.* Sequences of mammalian JAM proteins have been aligned using Clustal W. Sequences corresponding to the 12mer cytoplasmic tail of JAM are boxed in grey. The highly conserved Phe -8 is highlighted in blue and Phe -2 and Ser -3 in red.

**SUPPLEMENTARY FIGURE S4.** *NMR characterization of JAM-A\_P6 binding to PSG.* (A) 1D NMR spectrum of JAM-A\_P6. (B) WaterLOGSY of JAM-A\_P6. (C) WaterLOGSY of JAM-A\_P6 in the presence of PSG. (D) WaterLOGSY of JAM-A\_P6 in the presence of PDZ3. Experimental conditions were 300  $\mu$ M JAM-A\_P6 and +/- 10  $\mu$ M PSG or PDZ3 in 100 mM PO<sub>4</sub>/pH 7.2 at 25°C. Resonances corresponding to the sidechain of Phe2 are boxed in grey.

**SUPPLEMENTARY FIGURE S5.** *Titration of PSG with (A) JAM-A\_P6 and (B) JAM-A\_P12.* The intensity corresponds that to the phenylalanine signal at 7.2 ppm.

SUPPLEMENTARY FIGURE S1

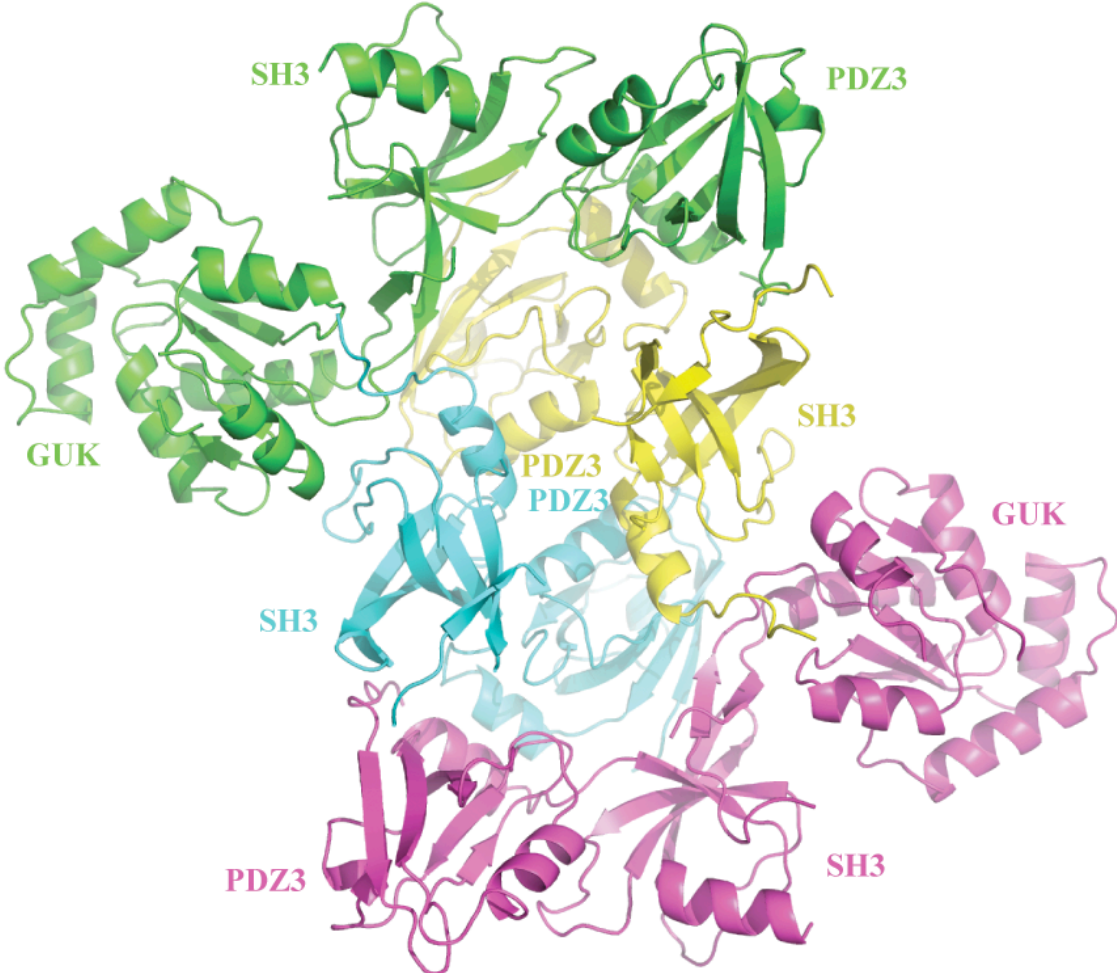

**SUPPLEMENTARY FIGURE S2**

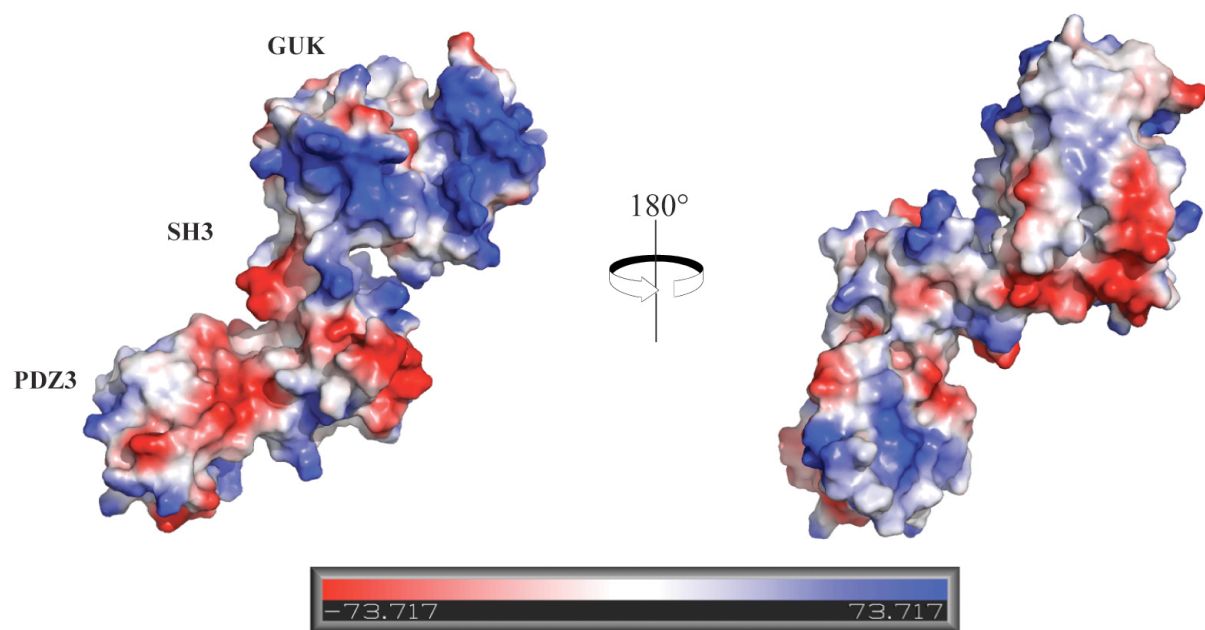



SUPPLEMENTARY FIGURE S4:

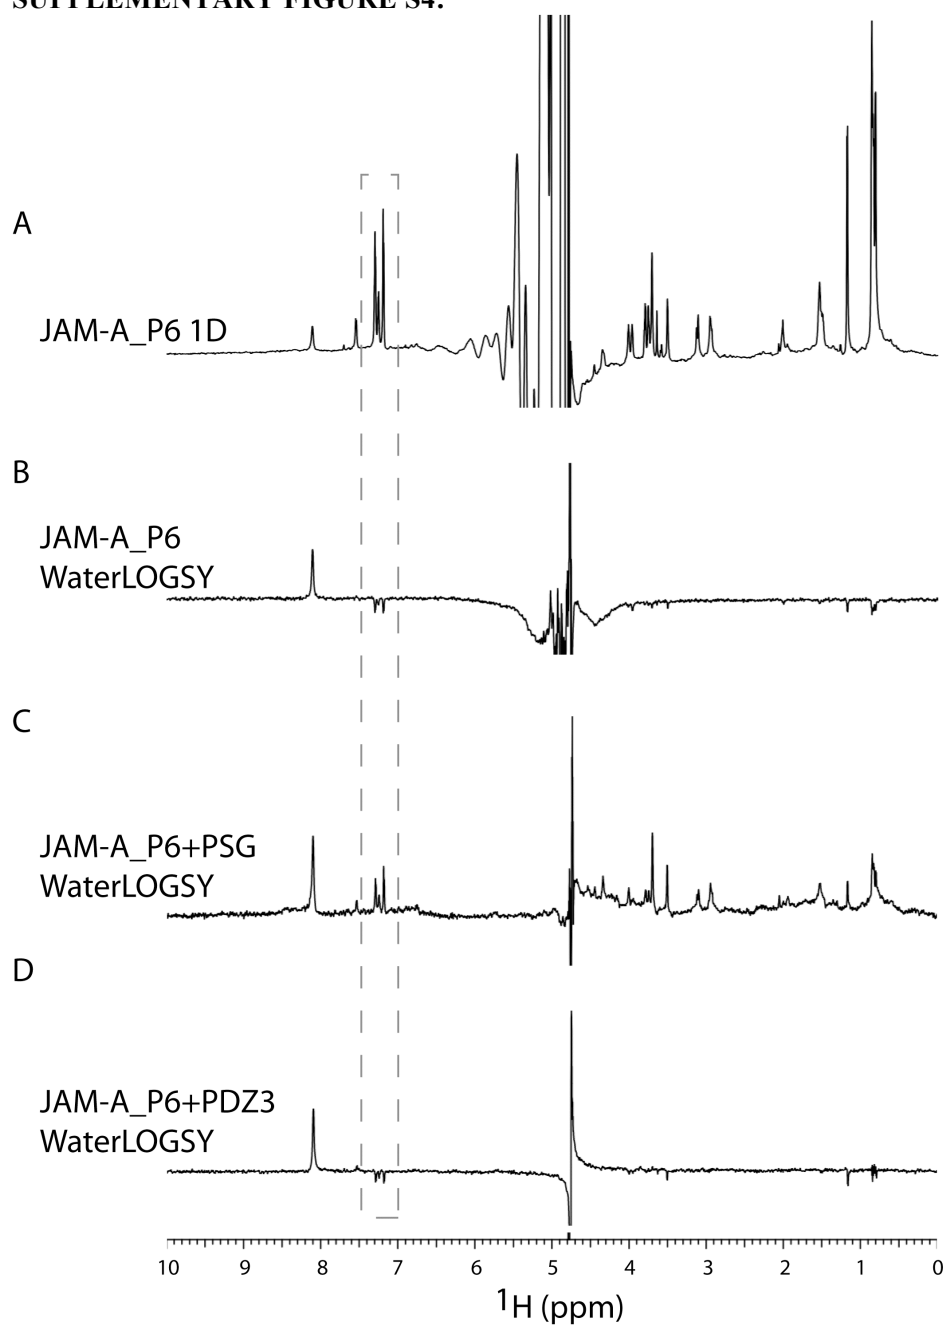

SUPPLEMENTARY FIGURE S5

A

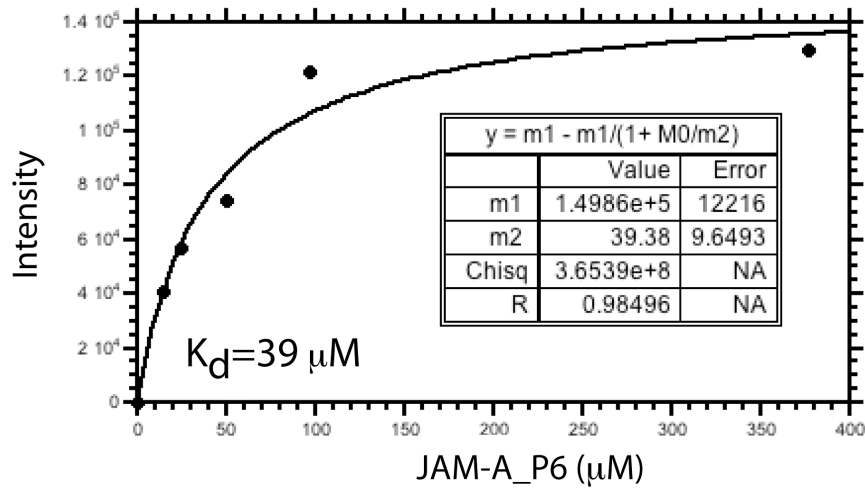

B

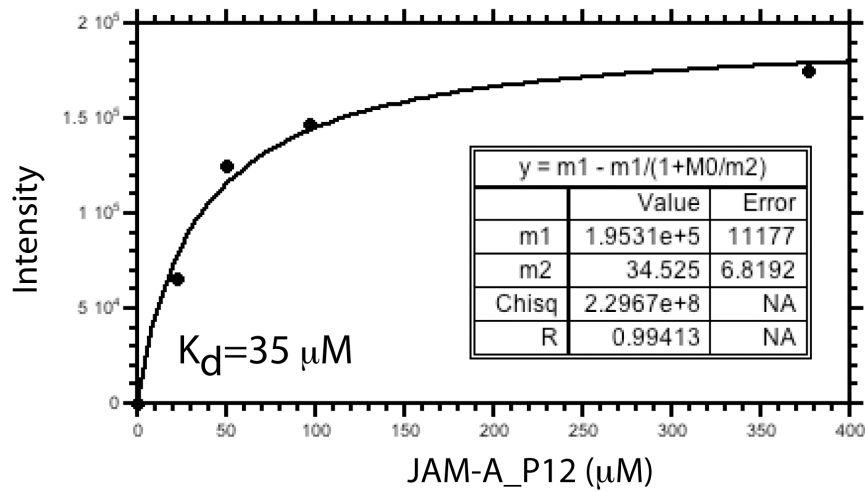

Supplement: supp_M111.304089_jbc.M111.304089-1.pdf [file supp_M111.304089_jbc.M111.304089-1.pdf]
